# Supplementary material for: TAF1 plays a critical role in AML1-ETO driven leukemogenesis
Source: PubMed Central journal article supplement (PMC6820555; doi:10.1038/s41467-019-12735-z), 2019-10-29
Supplement: 41467_2019_12735_MOESM1_ESM.pdf [file 41467_2019_12735_MOESM1_ESM.pdf]

# **TAF1 plays a critical role in AML1-ETO driven leukemogenesis**

Ye Xu et al.

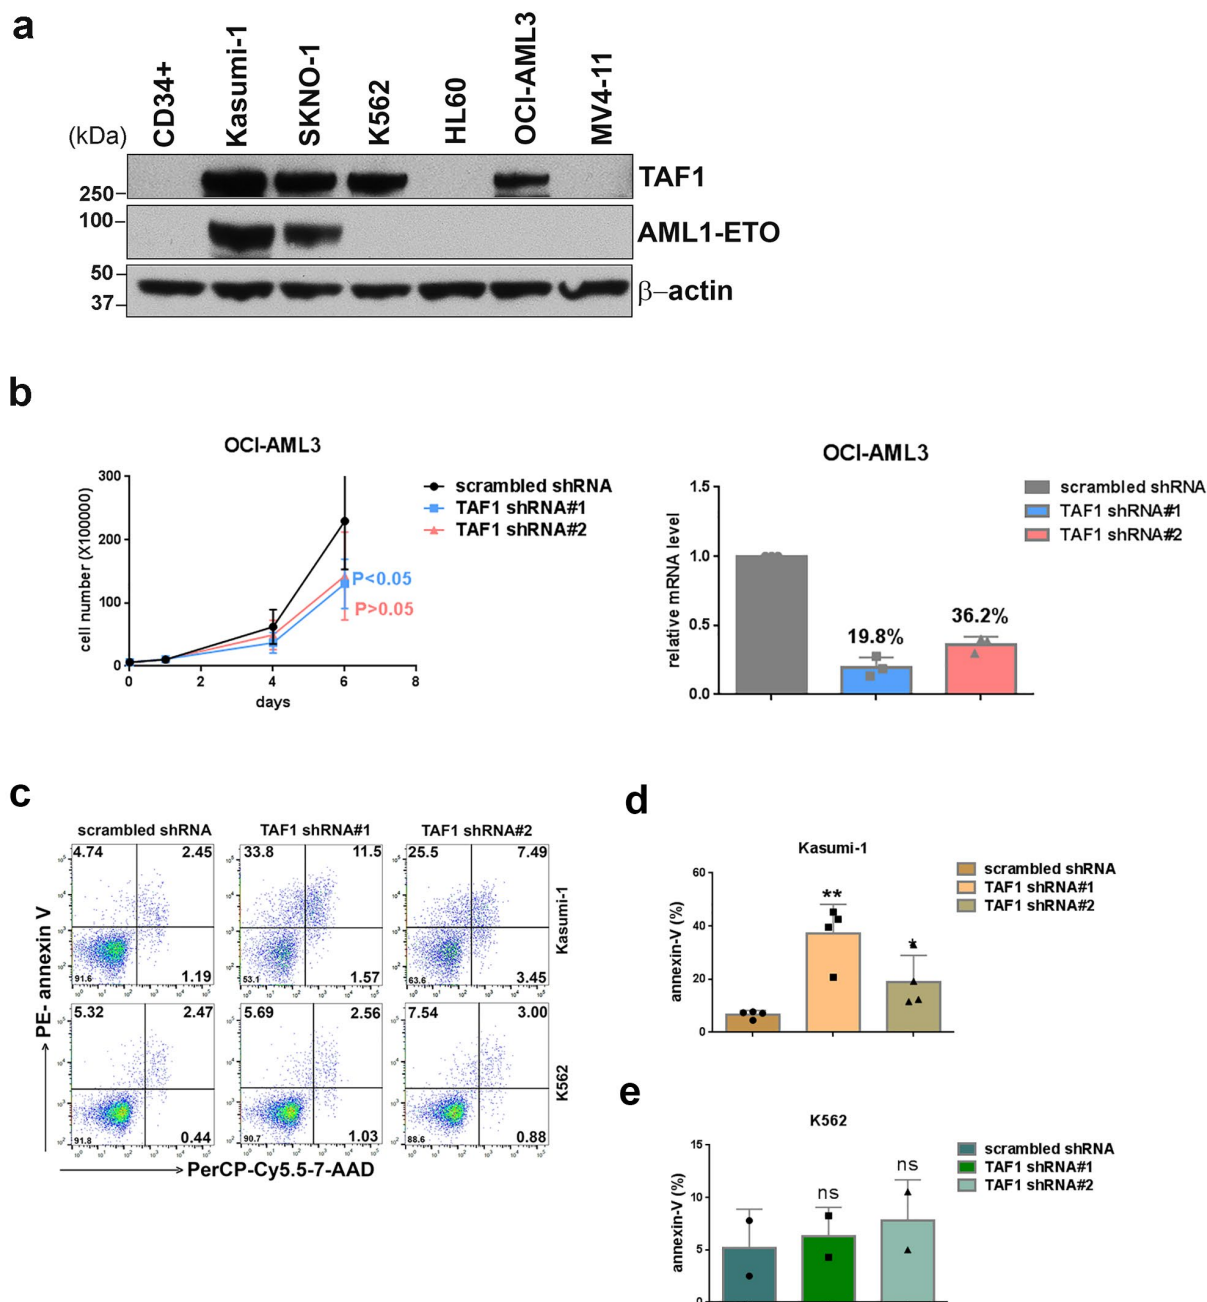

**Supplementary Figure 1. The knockdown of TAF1 has minor effect on the growth of OCI-AML3 cells and induces apoptosis in Kasumi-1 cells.** (a) The protein level of TAF1 in CD34+ HSPCs and AML cell lines. (b) TAF1 KD has minimal effect on the growth of OCI-AML3 cells. OCI-AML3 cells were infected with scrambled shRNA or two TAF1 directed shRNAs. The numbers of cells were counted at the indicated times (left panel). The cell numbers between cells infected with scrambled shRNA and TAF1 shRNAs at day 6 were compared using Student t test. p values are displayed. The levels of TAF1 expression in each type of cells are shown in the right panel and the percentage of the remaining level of TAF1 in each type of cells after TAF1 KD are shown on each columns. (c-e) Lack of TAF1 induces apoptosis in Kasumi-1 cells, but not in K562 cells. Kasumi-1 cells and K562 cells were transduced with scrambled shRNA or TAF1 directed shRNAs for 4 days and then subjected to apoptotic assays. Representative flow cytometry pictures are shown in (c). (d-e) The percentage of apoptotic cells in Kasumi-1 cells (d) or K562 cells (e) transduced with scrambled shRNA or TAF1 shRNAs are shown in bar graphs. The comparison of the percentage of apoptotic cells was performed between cells transduced with scrambled shRNA and each TAF1 shRNA by Student t test. \* indicates  $p < 0.05$ , \*\* indicates  $p < 0.01$  and “ns” indicates  $p > 0.05$ . (a-e) All experiments were repeated independently at least two times, (b)  $n = 3$ , (d)  $n = 4$ , (e)  $n = 2$ . All error bars represent mean  $\pm$  SD.

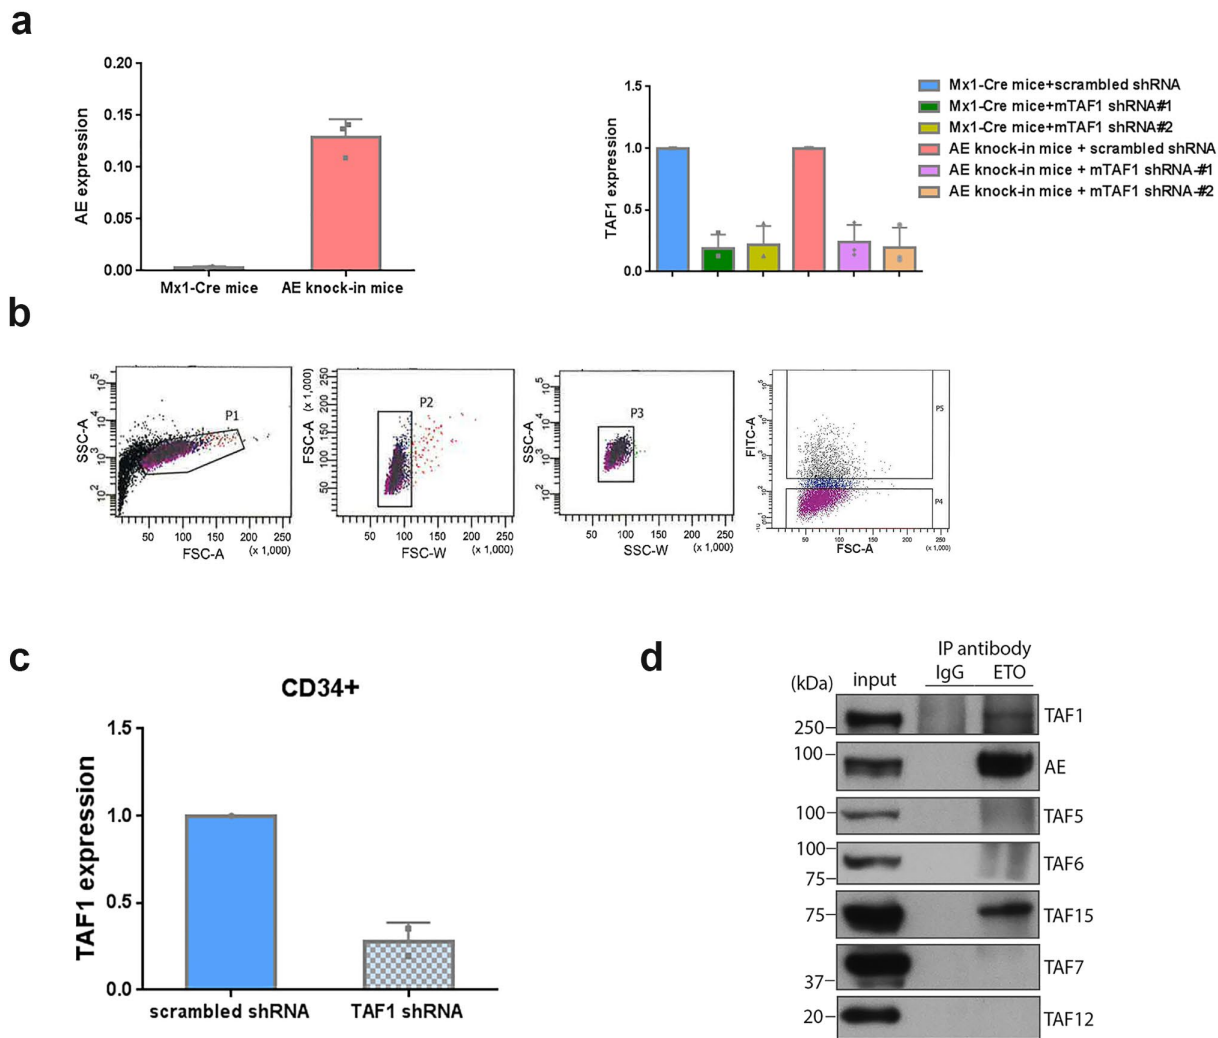

**Supplementary Figure 2. The expression of TAF1 and AE in bone marrow and CD34+ cells.** (a) AE was expressed in AE knock-in mice (left panel) and TAF1 was knocked down using mouse TAF1 shRNAs in bone marrow cells isolated from Mx1-Cre mice and AE knock-in mice (right panel). Experiments were repeated independently three times and error bars represent mean  $\pm$  SD. (b) Gating strategy for GFP+ AE-expressing CD34+ cells. CD34+ cells with normal or reduced level of TAF1 were infected with MigR1 or MigR1-AE viruses for 2 days and then GFP+ MigR1 cells or MigR1-AE expressing cells were sorted by flow cytometry. Non infected CD34+ cells were used as negative control. (c) TAF1 depletion levels in human CD34+ CB cells. Experiments were repeated independently two times and error bars represent mean  $\pm$  SD. (d) Co-immunoprecipitation assays were performed using an anti-ETO antibody in Kasumi-1 cells.

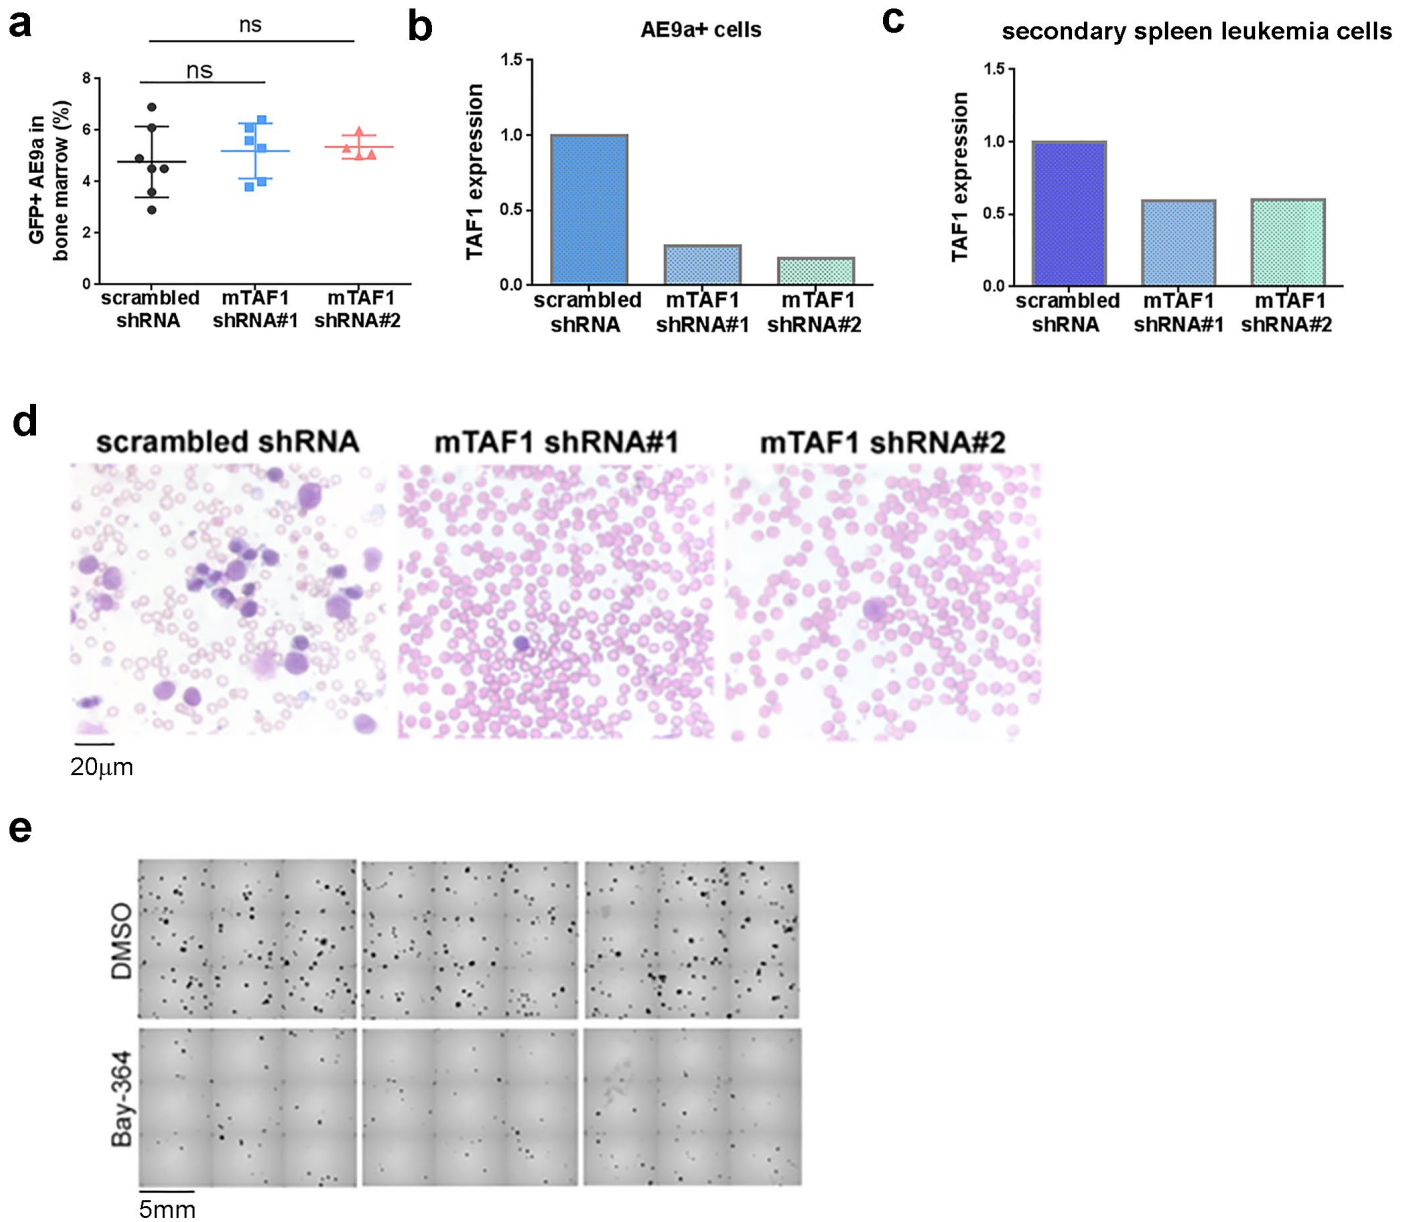

**Supplementary Figure 3. TAF1 is critical for leukemia development.** (a) Depletion of TAF1 does not affect the homing of AE9a+ luciferase+ cells to the bone marrow of transplanted recipient mice. Bone marrow cells were collected 16 hours after transplantation. The percentage of GFP+ AE9a+ cells in peripheral blood of mice injected with AE9a+ cells transduced with scrambled shRNA was compared with that in the mice injected with AE9a+ cells transduced with TAF1 shRNAs. p value was determined by Student t test. ns indicates  $p > 0.05$ . (b-c) The mRNA level of TAF1 in AE9a+ luciferase+ cells (b) or secondary spleen leukemia cells (c) after transduction of scrambled shRNA or mouse TAF1 shRNAs. (d) Depletion of TAF1 abrogates the growth of leukemia cells in peripheral blood. Representative images show the H&E staining of peripheral blood from mice transplanted with secondary spleen leukemia cells infected with scrambled shRNA or mouse TAF1 shRNAs for 7 weeks. (e) Bay-364 inhibits the colony formation of AE9a+ cells. AE9a+ cells were treated with vehicle or 10uM Bay-364 for 2 days and same numbers of cells were plated on methylcellulose-based medium containing vehicle or 3 uM Bay-364 for 7 days. The 6-well plates were scanned using STEMvison software. The experiments were repeated independently three times. Three representative areas in each treatment group are shown.

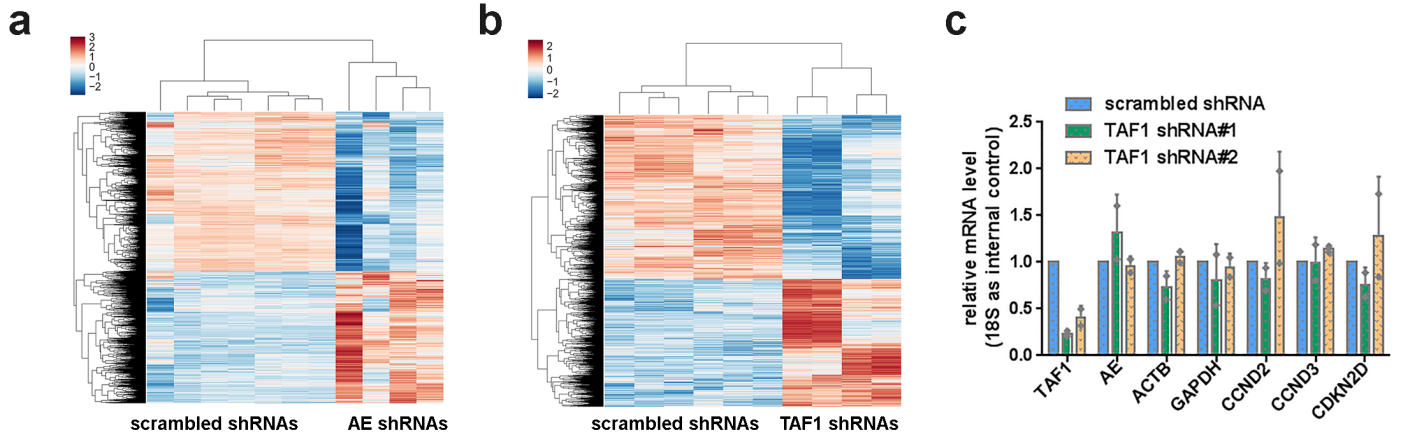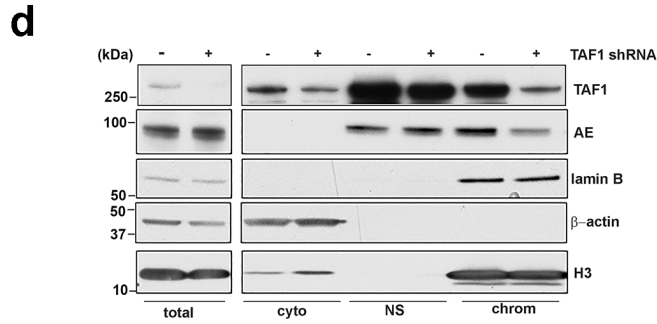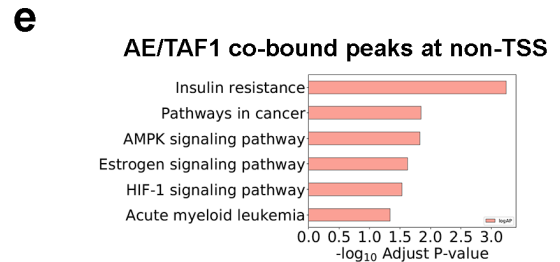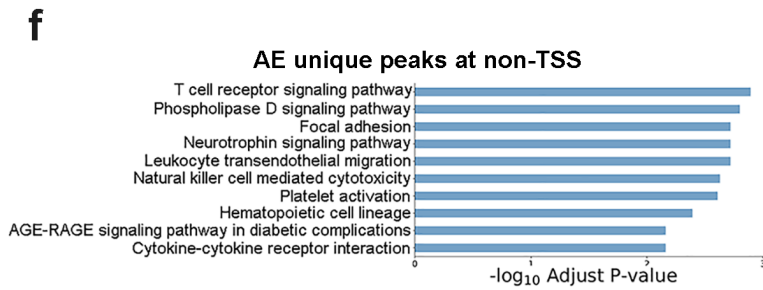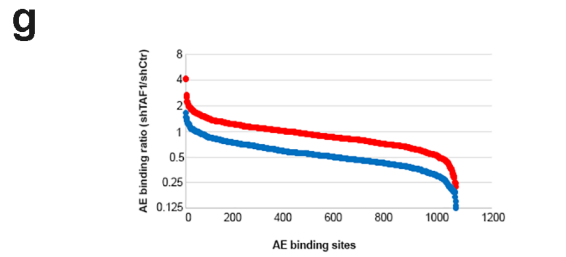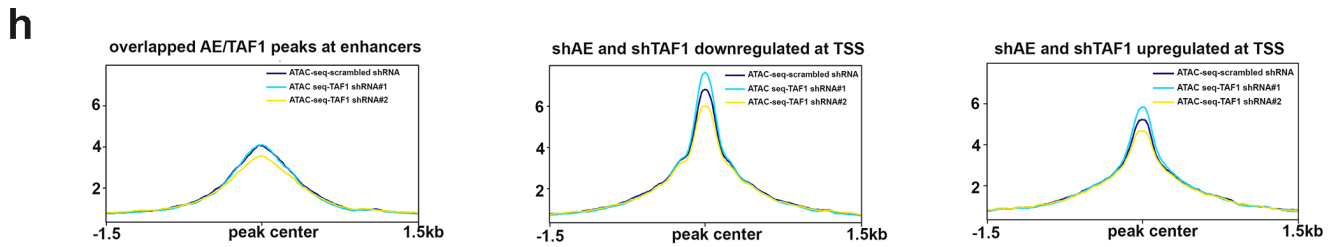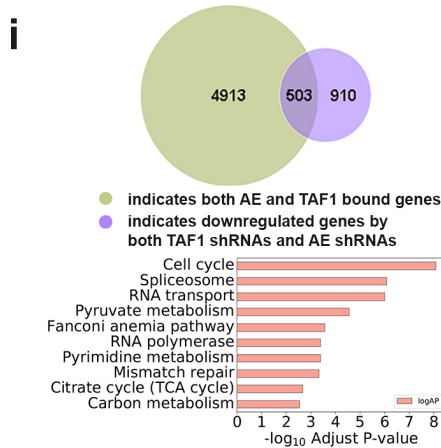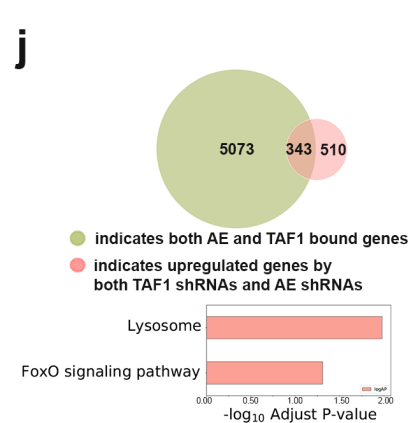

**Supplementary Figure 4. The KD of AE or TAF1 changes the expression of a subset of AE regulated genes.** (a-b) Heat maps of differentially expressed gene in Kasumi-1 cells infected with AE shRNAs (a) or TAF1 shRNAs (b) compared to those infected with scrambled shRNA. Heat maps were generated from variance stabilized counts of genes differentially expressed with a BH FDR  $q < 0.05$  and a fold change  $\pm 1.5$  vs control. (c) The influence of TAF1 knockdown on the expression of housekeeping genes and cell cycle regulatory genes in Kasumi-1 cells. Kasumi-1 cells were transduced with scrambled shRNA or TAF1 shRNAs for 5 days. mRNA levels of individual genes were standardized by the level of 18S rRNA. (d) TAF1 KD reduces the association of AE with chromatin 3 days after TAF1 KD. “total” indicates the whole cell extract; “cyto” indicates the cytoplasm fraction; “NS” indicates the nuclear soluble fraction; “chrom” indicates the chromatin fraction. (e-f) KEGG analysis was performed for genes adjacent to AE/TAF1 overlapping peaks at non-TSS (e) or AE unique peaks at non-TSS (f) (g) AE binding signals are compared at 1,061 AE binding sites which are occupied by TAF1 between cells with TAF1 KD and cells with normal TAF1 level. The ratios (shTAF1/shCtr) displayed on the y-axis are ranked from high to low at each site as shown on the x-axis. Two biological replicates are shown in different colors. (h) TAF1 KD does not change the global chromatin accessibility at AE and TAF1 overlapped peaks at enhancer regions (left), nor at the TSS regions of downregulated (middle) and upregulated (right) genes by both AE and TAF1 KD. (i-j) Venn diagrams illustrate the genes adjacent to co-localized TAF1 and AE peaks overlapping with genes downregulated (i) or upregulated (j) ( $q < 0.05$ ) by both TAF1 and AE shRNAs. KEGG gene sets were performed on overlapping genes.

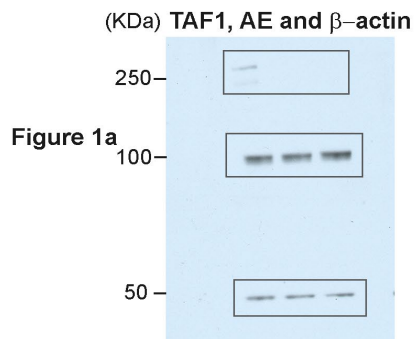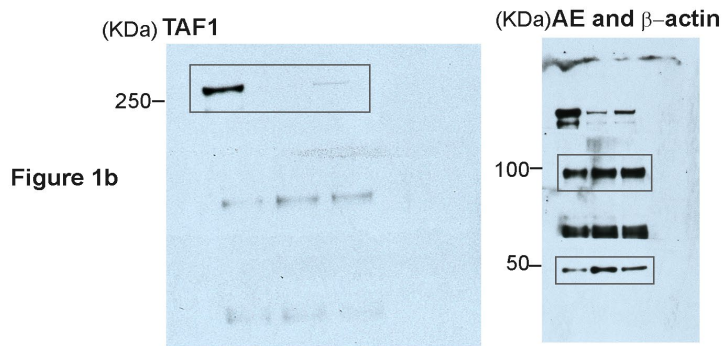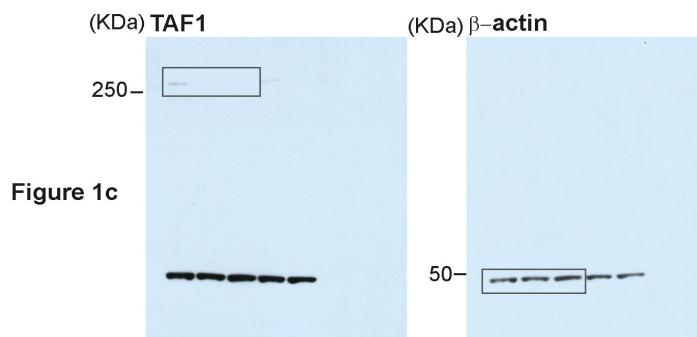

Supplementary Figure 5. Uncropped scans from figure 1. The boxes indicate the cropped images.



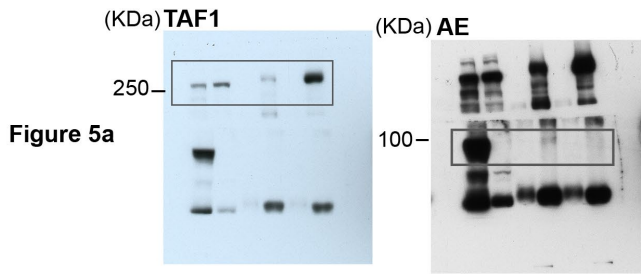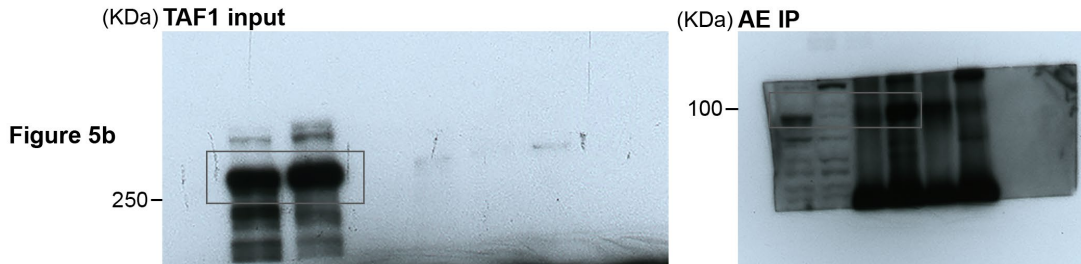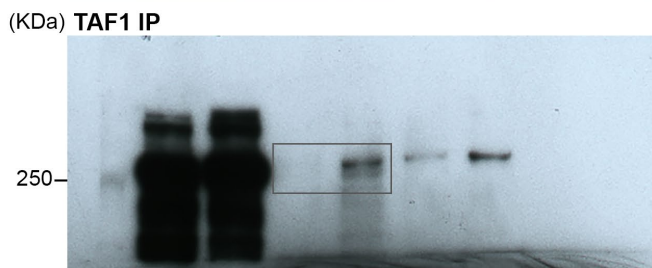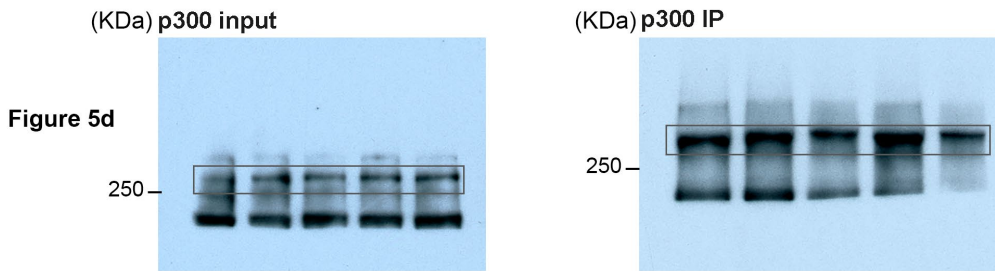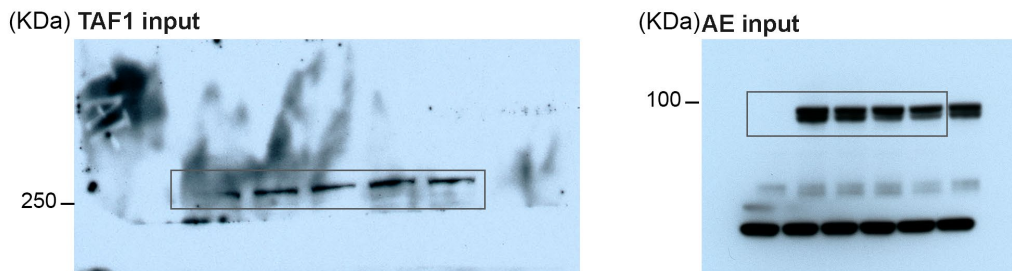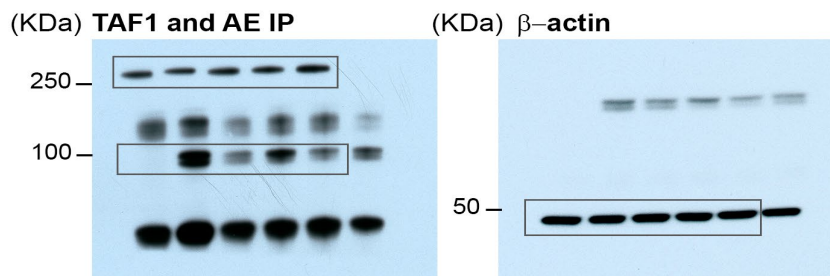



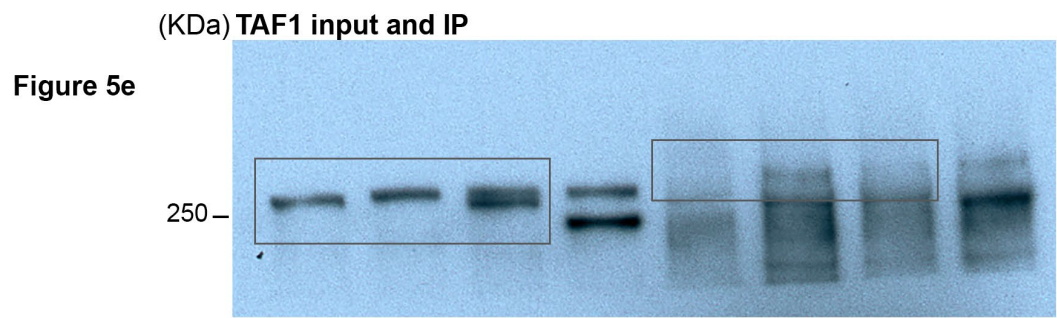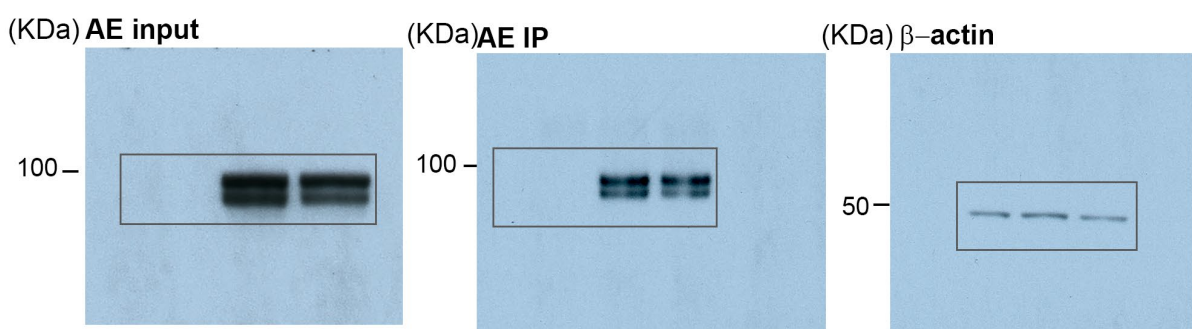

**Supplementary Figure 6. Uncropped scans from figure 5. The boxes indicate the cropped images.**

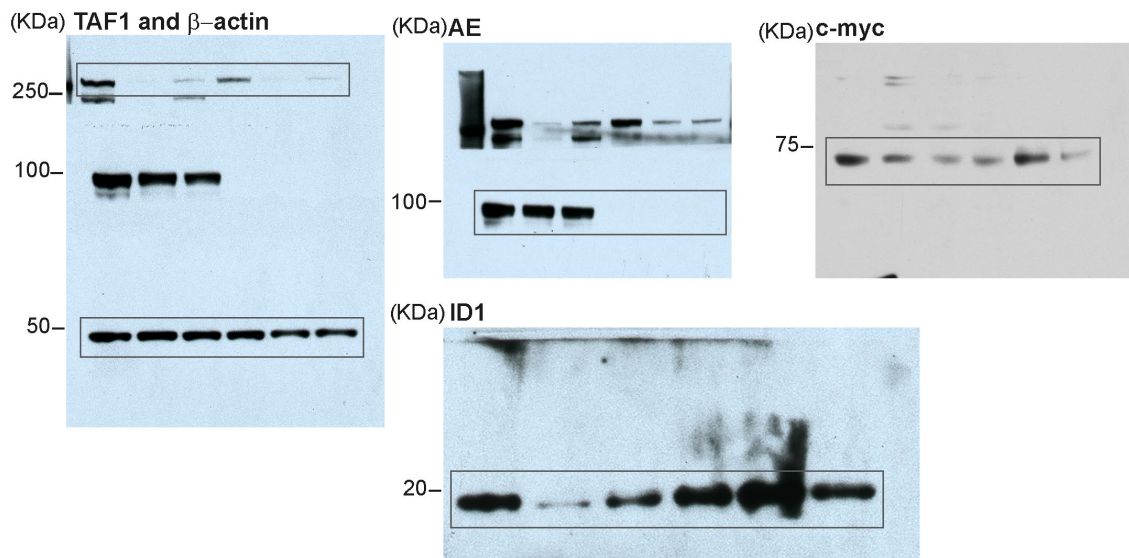

**Supplementary Figure 7. Uncropped scans from figure 6d. The boxes indicate the cropped images.**

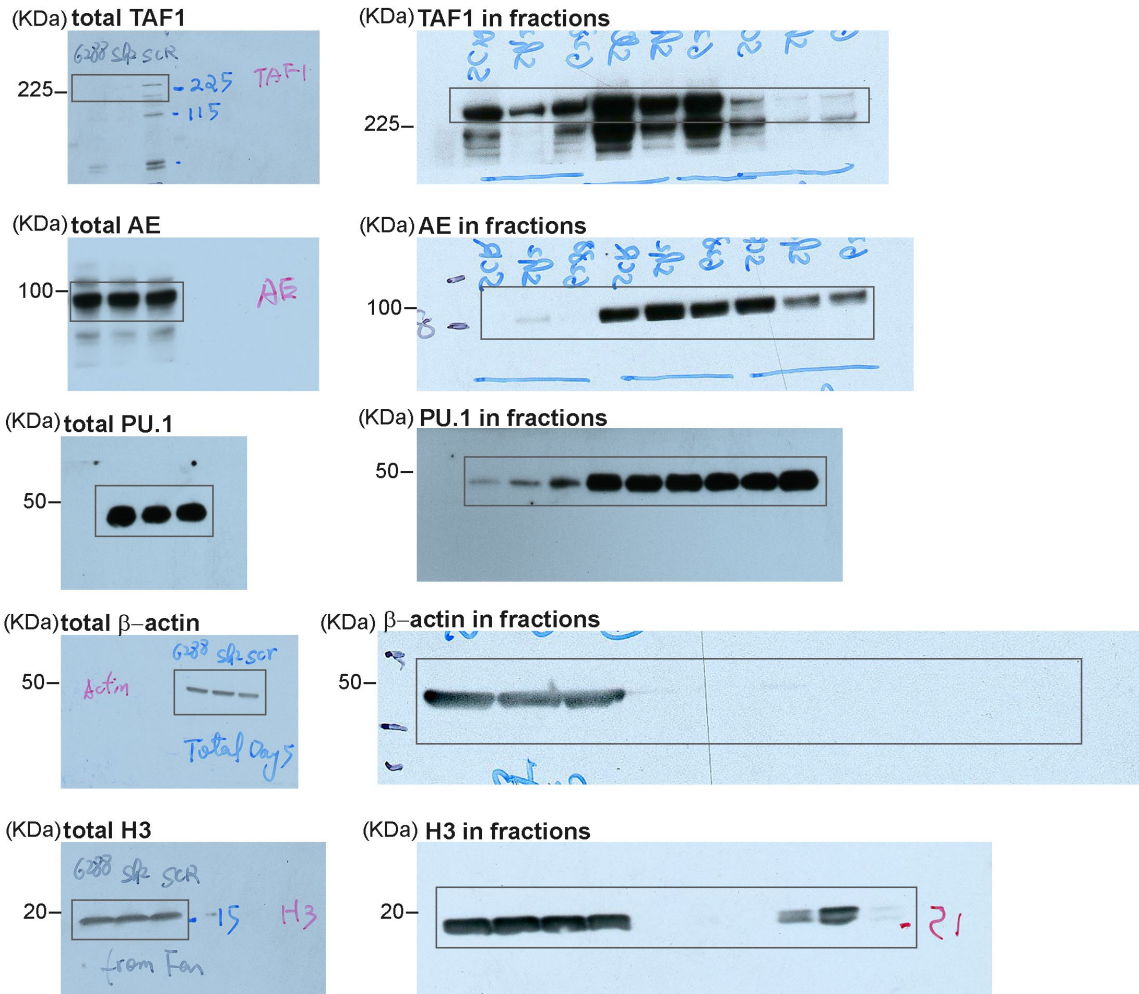

Supplementary Figure 8. Uncropped scans from figure 7a. The boxes indicate the cropped images.

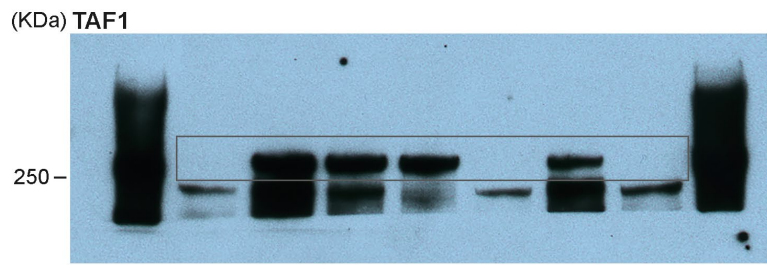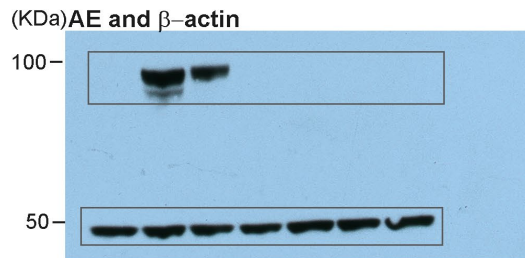

**Supplementary Figure 9. Uncropped scans from supplementary figure 1a. The boxes indicate the cropped images.**

**Supplementary Table 1. Mass spectrometry analysis of proteins associated with AE.**

| unique | total | Reference          | Gene symbol |
|--------|-------|--------------------|-------------|
| 12     | 30    | Q06455_MTG8_HUMAN  | RUNX1T1     |
| 13     | 19    | Q01196_RUNX1_HUMAN | RUNX1       |
| 8      | 9     | Q13951_PEBB_HUMAN  | CBFB        |
| 2      | 2     | P21675_TAF1_HUMAN  | TAF1        |
| 2      | 2     | Q92804_RBP56_HUMAN | TAF15       |

**Supplementary Table 2. Antibodies used in the study.**

| Antibody (clone)                | manufacturer                | Catalog number | applications                   |
|---------------------------------|-----------------------------|----------------|--------------------------------|
| TAF1                            | Santa Cruz                  | SC-735         | ChIP-seq, IP, western (1:1000) |
| TAF1                            | Bethyl Laboratories         | A303-505A      | Western (1:1000)               |
| TAF1                            | Millipore                   | 04-1525        | ChIP-seq, IP                   |
| TAF5                            | Bethyl Laboratories         |                | Western (1:1000), IP           |
| TAF6                            | Bethyl Laboratories         | A301-275A      | IP                             |
| TAF6                            | Bethyl Laboratories         | A301-276A      | Western(1:1000)                |
| TAF7                            | Sigma                       | SAB1404438     | Western, IP                    |
| TAF12                           | Proteintech                 | 12353-1-AP     | Western (1:1000), IP           |
| TAF15                           | Abcam                       | Ab134916       | Western (1:1000), IP           |
| AML1-ETO                        | Invitrogen                  | PA5-40076      | ChIP-seq                       |
| AML1-ETO                        | Diagenode                   | C15310197      | ChIP-seq                       |
| ETO(C-20)                       | Santa Cruz                  | SC-9737        | IP, western (1:1000)           |
| AML1                            | Cell Signaling Technologies | 4334s          | Western (1:1000)               |
| P300                            | Santa Cruz                  | SC-585         | ChIP-seq, western (1:1000)     |
| P300                            | Diagenode                   | C15200211      | ChIP-seq                       |
| $\beta$ -actin                  | Santa Cruz                  | SC-47778       | Western (1:5000)               |
| CARM1                           | Millipore                   | 09818          | Western (1:1000)               |
| c-myc(9E10)                     | Santa Cruz                  | SC-40          | Western (1:1000)               |
| ID1 (C-20)                      | Santa Cruz                  | SC-488         | Western(1:1000)                |
| H3                              | Abcam                       | ab18521        | Western (1:5000)               |
| H3K4me1                         | Diagenode                   | C15200150      | ChIP-seq                       |
| H3K27Ac                         | Millipore                   | 07-360         | ChIP-seq                       |
| Polymerase II (N-20)            | Santa Cruz                  | SC-890X        | ChIP-seq                       |
| FITC-BrdU                       | BD Pharmingen               | 559619         | BrdU assay (1:100)             |
| Human PE-CD11b                  | BD Pharmingen               | 555388         | Flow cytometry (1:100)         |
| Mouse perCP/cy5.5-Gr1 (RB6-8C5) | BD Pharmingen               | 108428         | Flow cytometry (1:100)         |
| Mouse PE-mac1 (m1/70)           | BD Pharmingen               | 567397         | Flow cytometry (1:100)         |
| PE-Annexin V                    | BD Pharmingen               | 559763         | Flow cytometry (1:20)          |
| 7-AAD                           | BD Pharmingen               | 559763         | Flow cytometry (1:100)         |



**Supplementary Table 3. Primers used in the study**

|                     |                                    |               |
|---------------------|------------------------------------|---------------|
| Human <i>TAF1</i>   | Forward: TTCCACACTCCAGTCAATGC      |               |
|                     | Reverse: GTGTTTTGGCCCATTGTAGG      |               |
| Human <i>18S</i>    | Forward: CCCAGTAAGTGCGGGTCATA      |               |
|                     | Reverse: GATCCGAGGGCCTCACTAAAC     |               |
| Human <i>ID1</i>    | Forward: CTACGACATGAACGGCTGTTACTC  |               |
|                     | Reverse: CTTGCTCACCTTGCGGTTCT      |               |
| <i>AML1-ETO</i>     | Forward: AATCACAGTGGATGGGCCC       |               |
|                     | Reverse: TCGTCTTCACATCCACAGG       |               |
|                     | Probe: CTGAGAAGCACTCCACAATGCCAGACT |               |
| Mouse <i>ID1</i>    | Forward: CGACTACATCAGGGACCTGCA     |               |
|                     | Reverse: GAACACATGCCGCCTCGG        |               |
| Mouse <i>18S</i>    | Forward: GTAACCCGTTGAACCCATT       |               |
|                     | Reverse: CCATCCAATCGGTAGTAGCG      |               |
| Mouse <i>TAF1</i>   | Forward: TGCTCGGAGAAAGAGGAAAA      |               |
|                     | Reverse: GACTCCACAGGAGCCATCAT      |               |
| Mouse <i>GAPDH</i>  | Forward: CCTGACCTGCCGTCTAGAAAA     |               |
|                     | Reverse: CTCCGACGCCTGCTTCAC        |               |
| probe               | source                             | identifier    |
| Human <i>MYC</i>    | Thermos Fisher                     | Hs00153408_m1 |
| Human <i>ACTB</i>   | Thermos Fisher                     | Hs01060665_g1 |
| Human <i>CCND2</i>  | Thermos Fisher                     | Hs00153380-m1 |
| Human <i>CDKN2D</i> | Thermos Fisher                     | Hs01017690_g1 |
| Human <i>CCND3</i>  | Thermos Fisher                     | Hs00176481_m1 |
| Mouse <i>ID1</i>    | Thermos Fisher                     | Mm00775963_g1 |
| Mouse <i>MYC</i>    | Thermos Fisher                     | Mm00487804_m1 |
